# Supplementary figures and images for: Self-adjuvanted l-arginine-modified dextran-based nanogels for sustained local antigenic protein delivery to antigen-presenting cells and enhanced cellular and humoral immune responses
Source: Royal Society of Chemistry journal article supplement (doi:10.1039/d3bm01150j), 2024-01-01

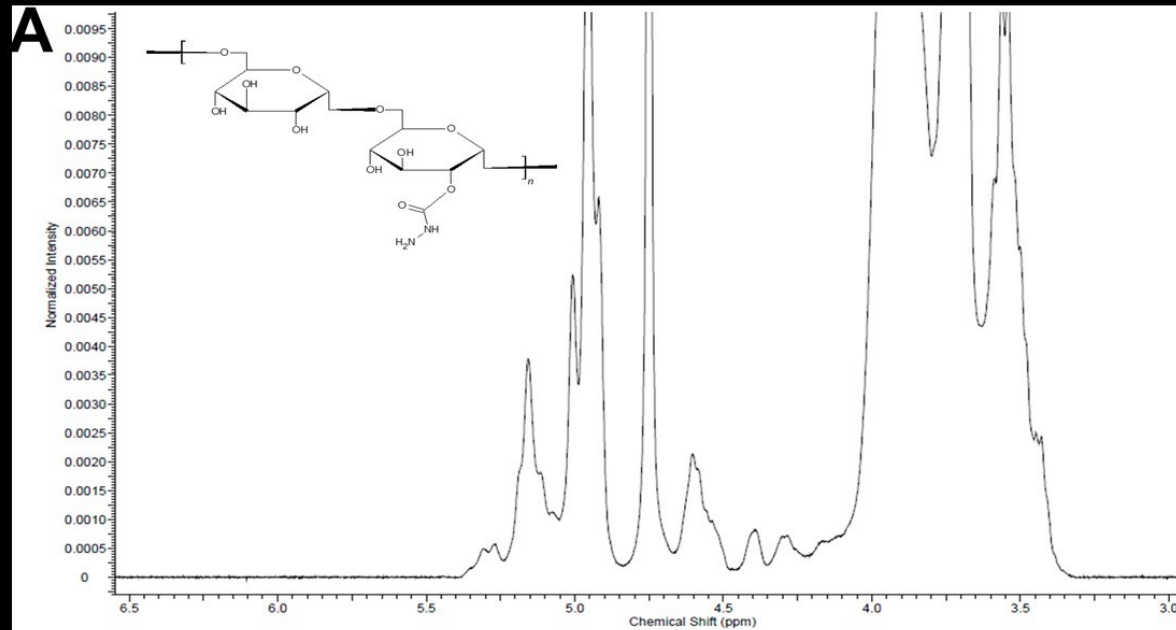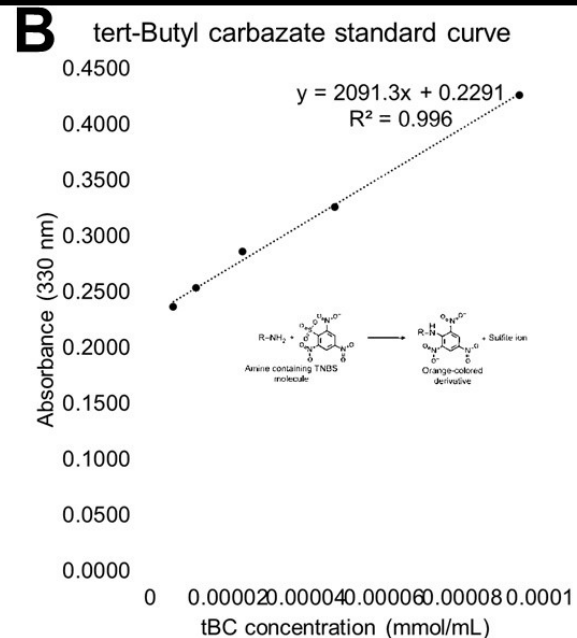

Supplement: d3bm01150j10.pdf [file d3bm01150j10.pdf]

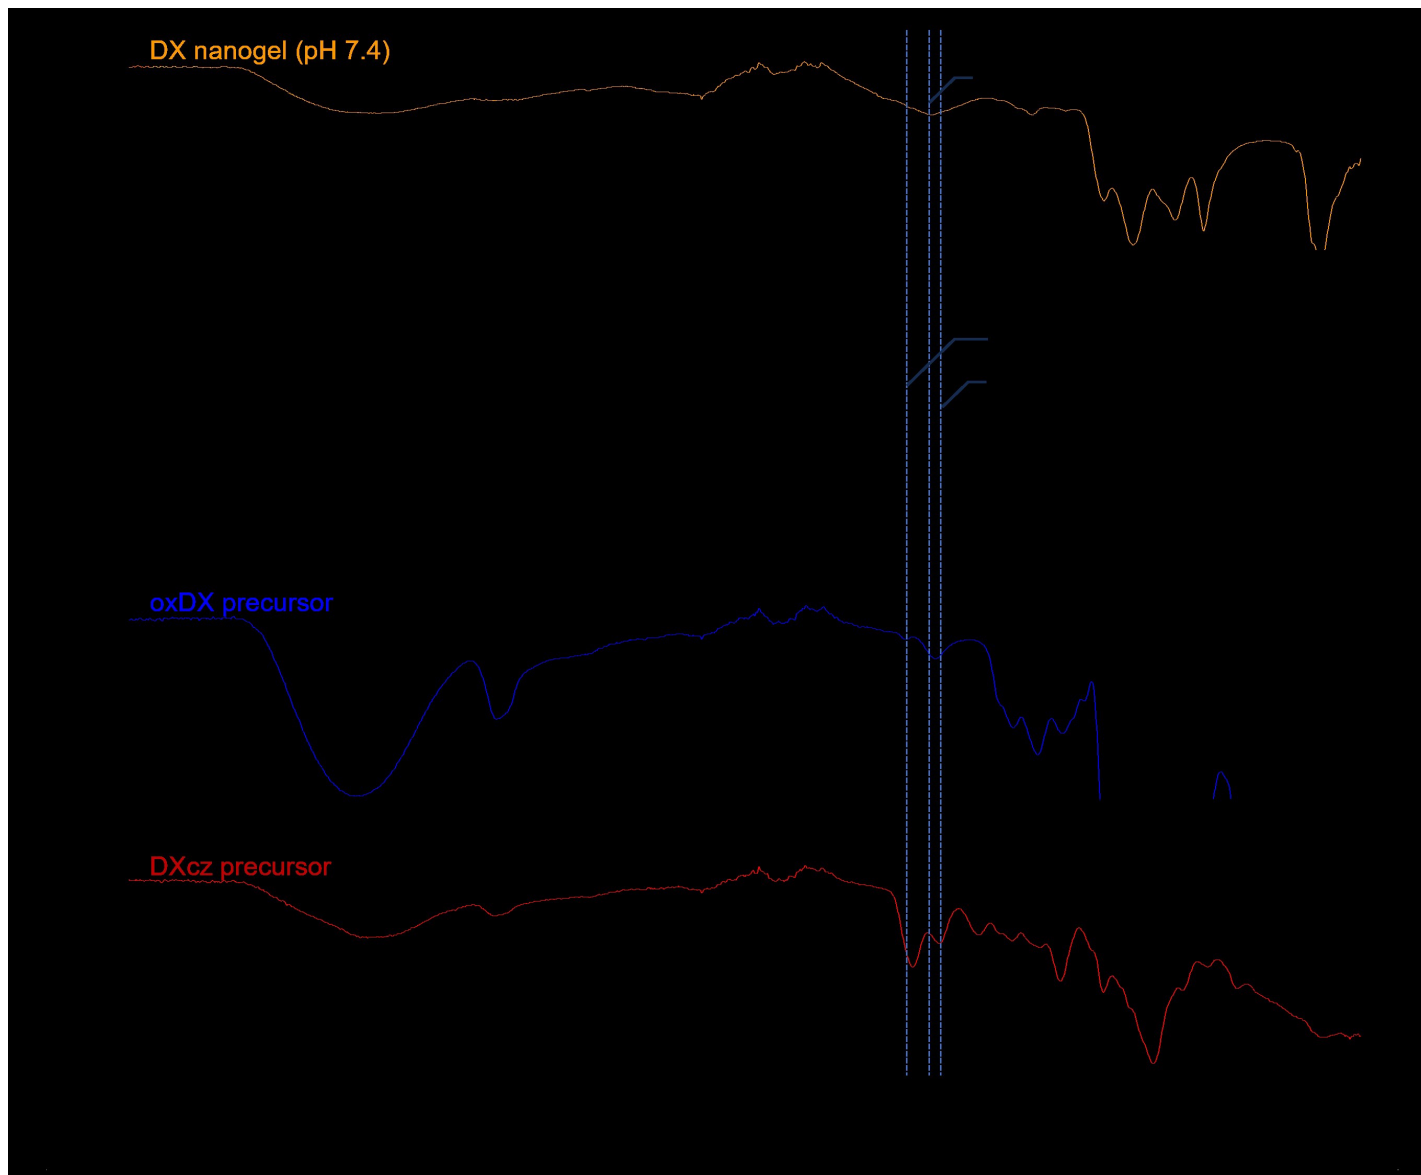

Supplement: d3bm01150j11.pdf [file d3bm01150j11.pdf]

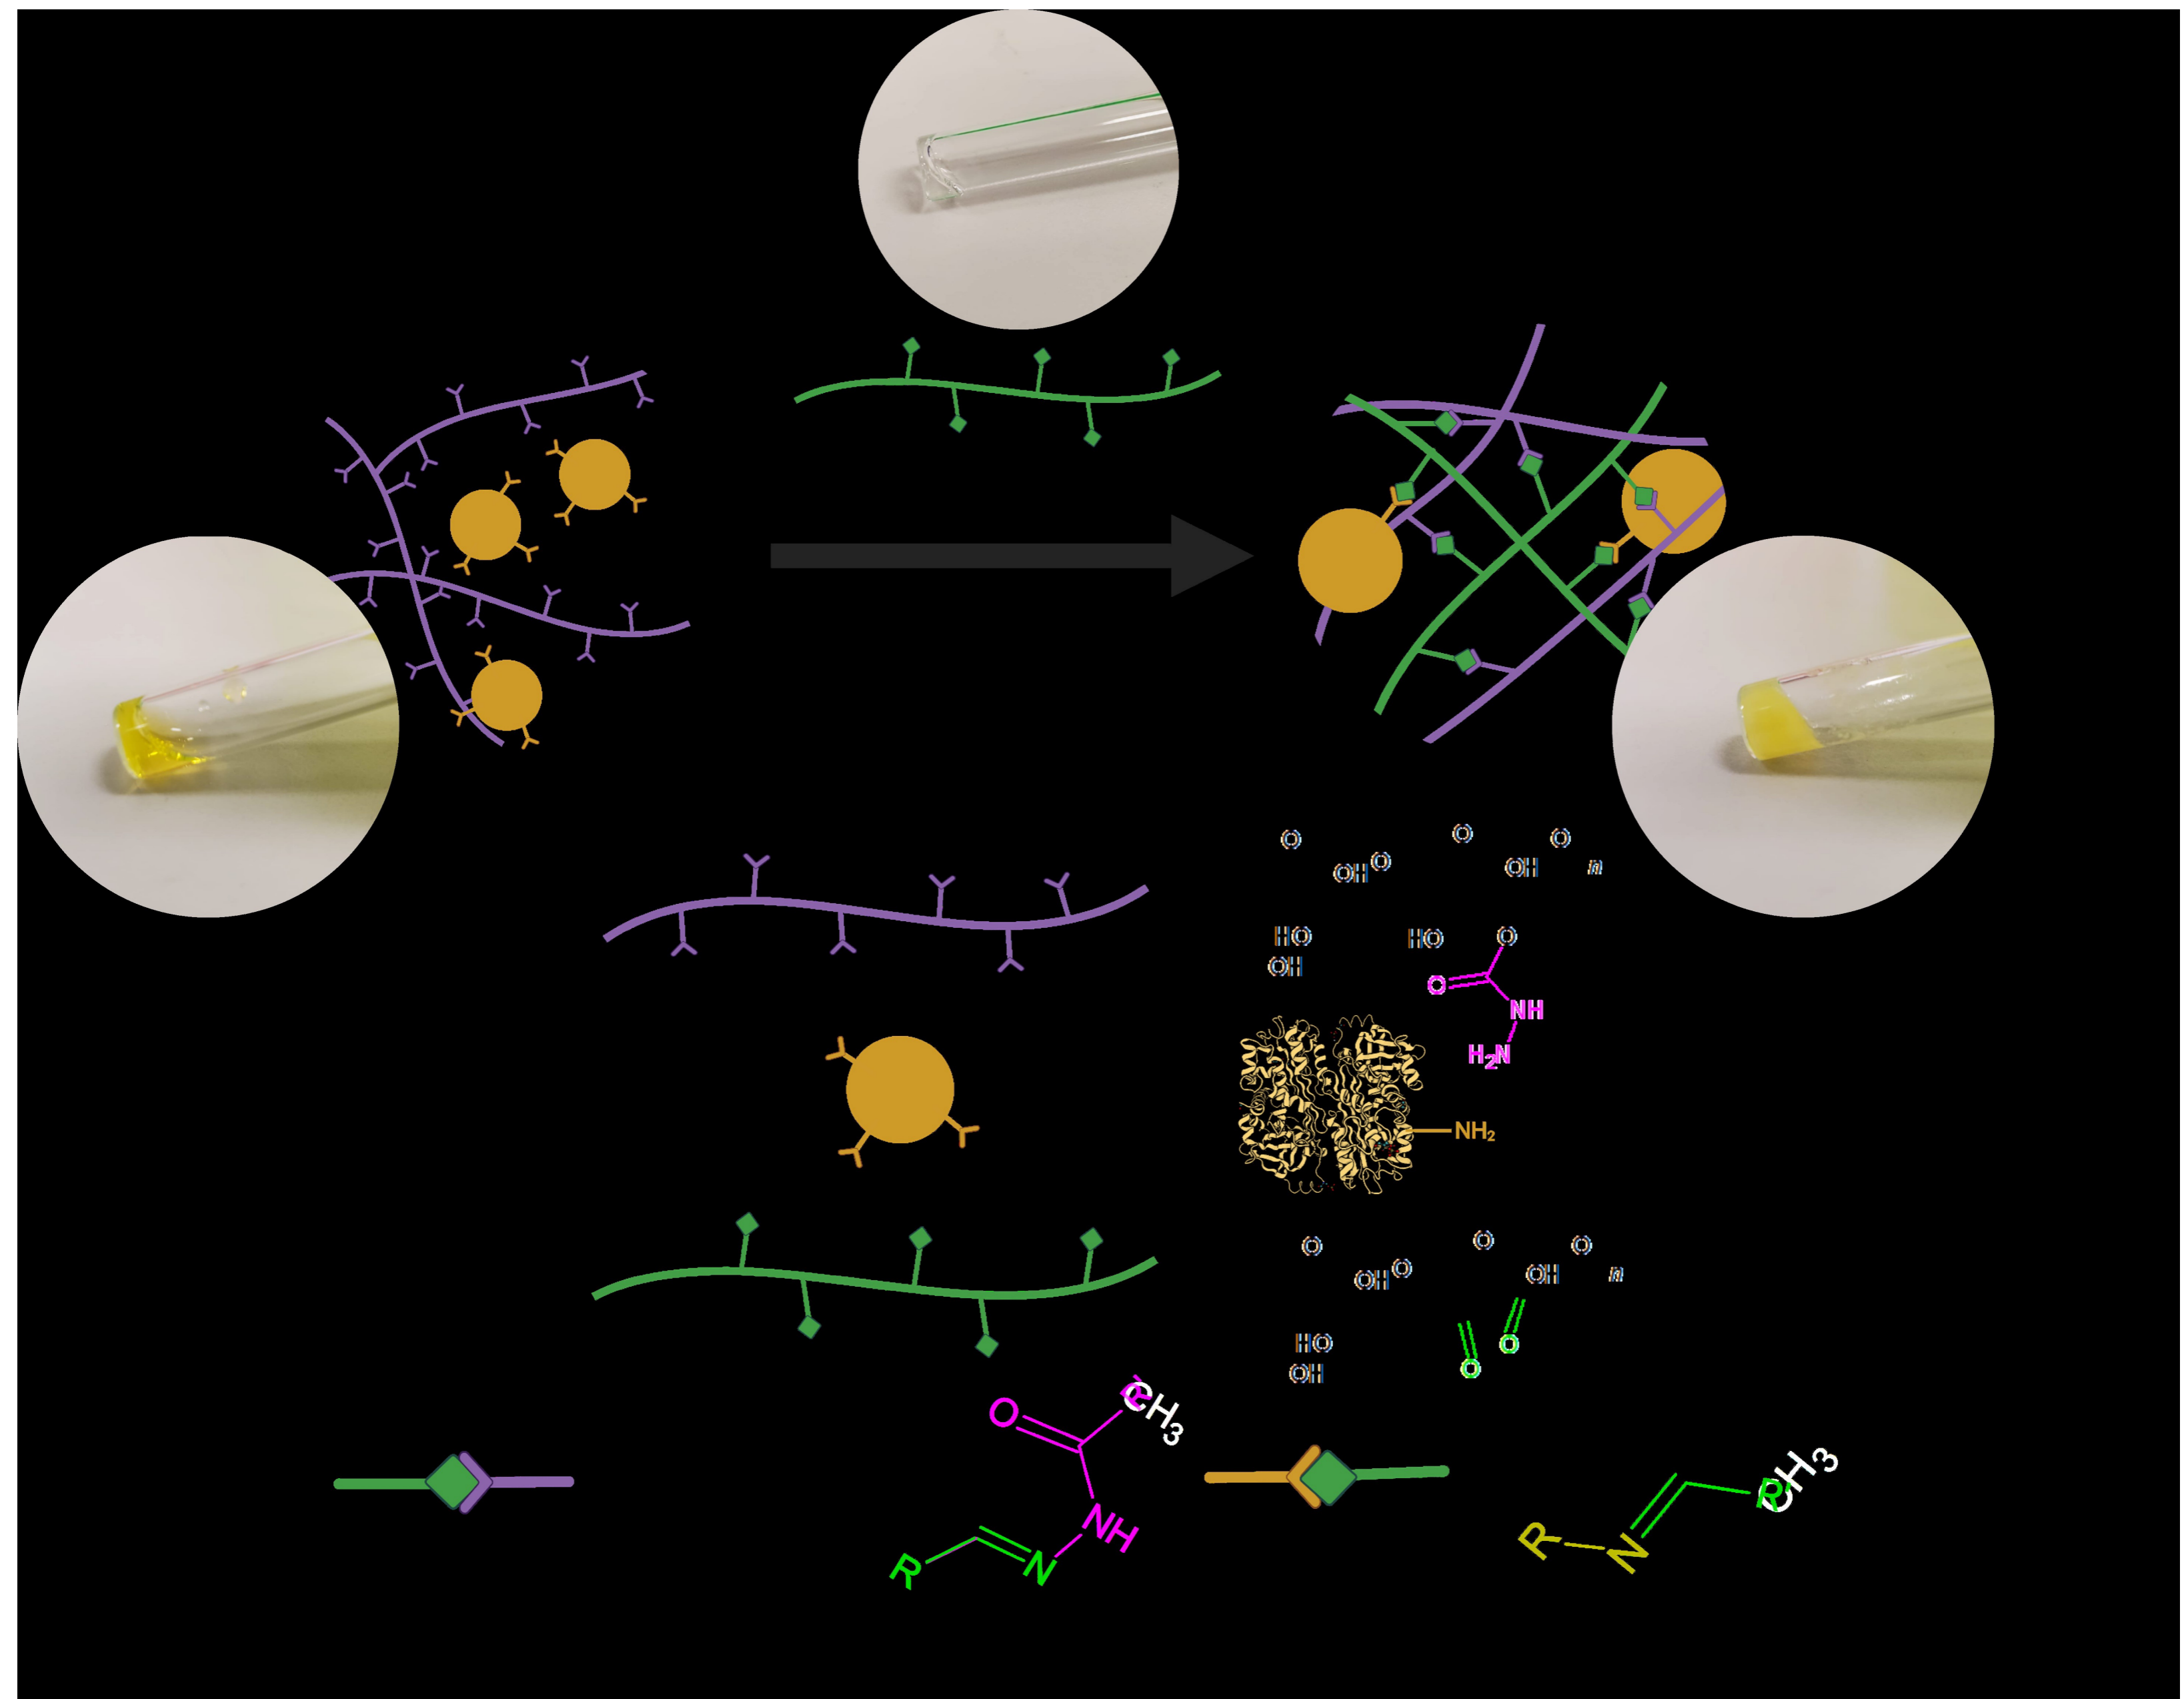

Supplement: d3bm01150j12.pdf [file d3bm01150j12.pdf]

**A**

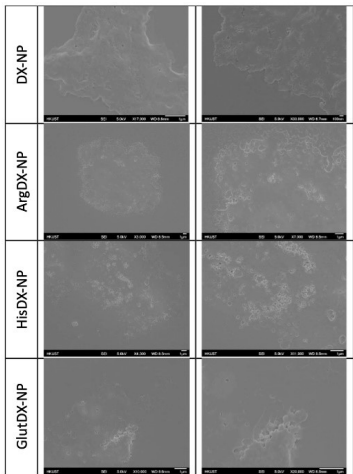

**B**

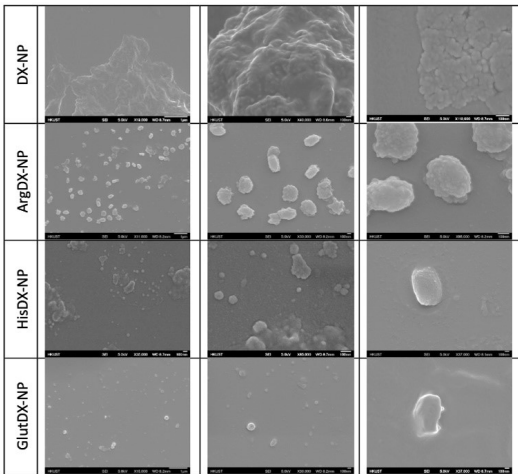

Supplement: d3bm01150j13.pdf [file d3bm01150j13.pdf]

DX

ArgDX

GlutDX

HisDX

Alum

Bolus

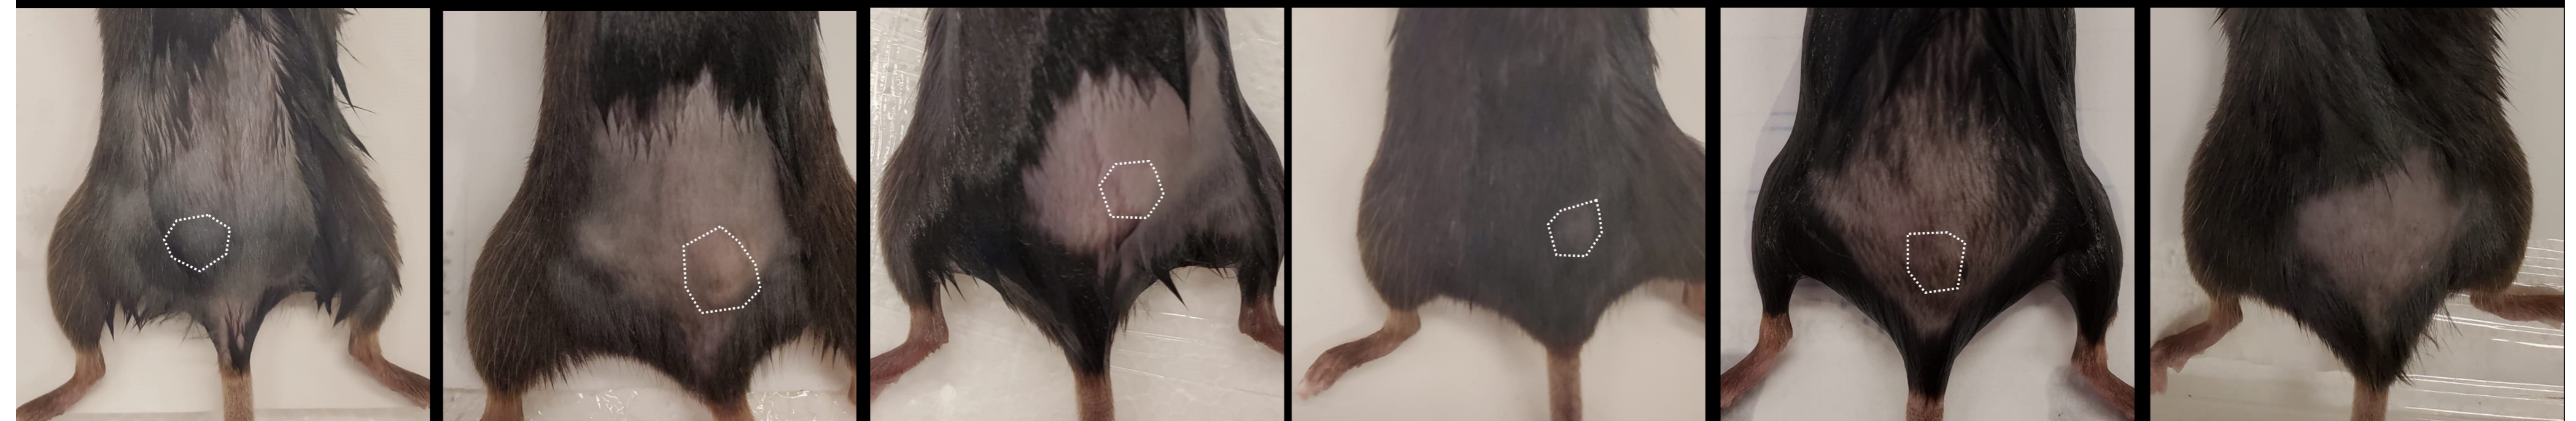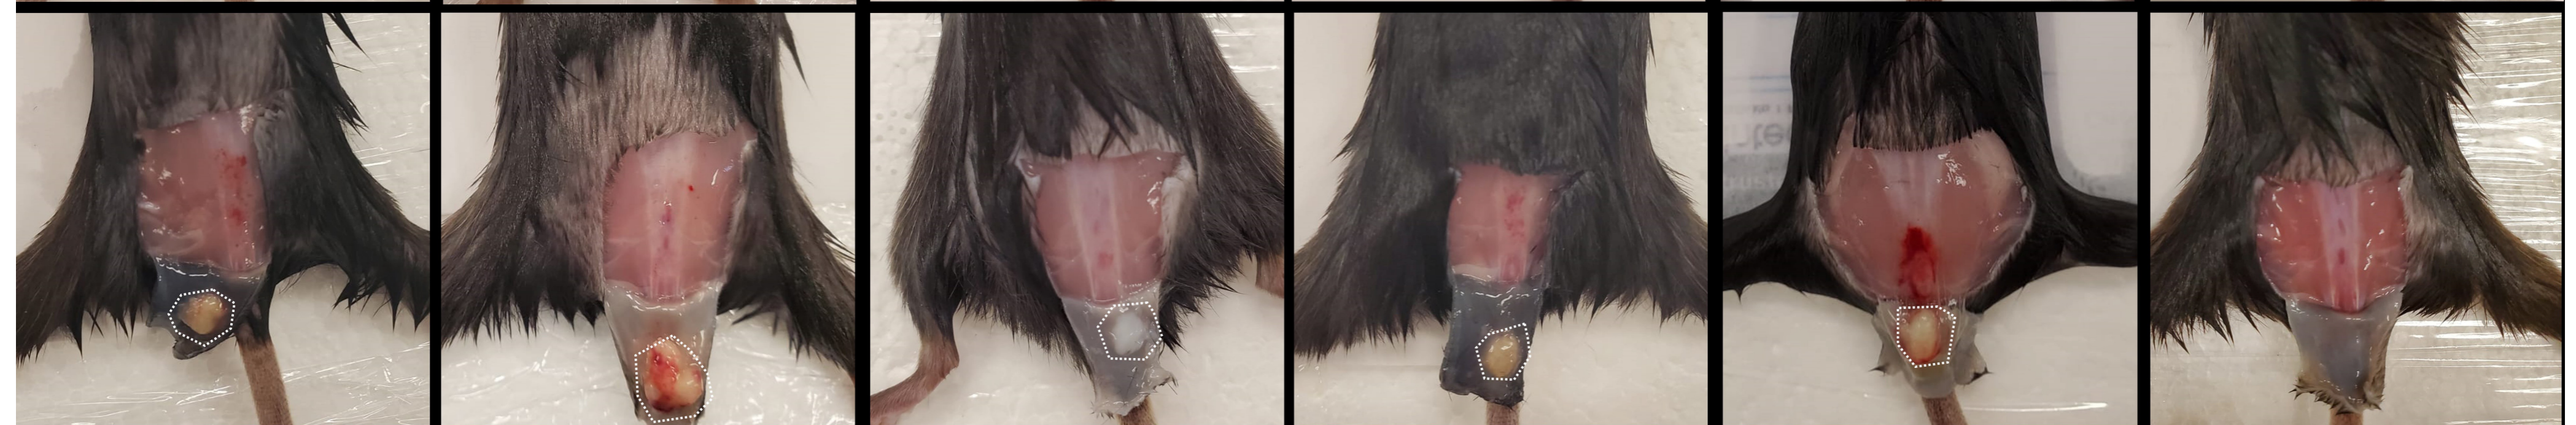

Supplement: d3bm01150j14.pdf [file d3bm01150j14.pdf]

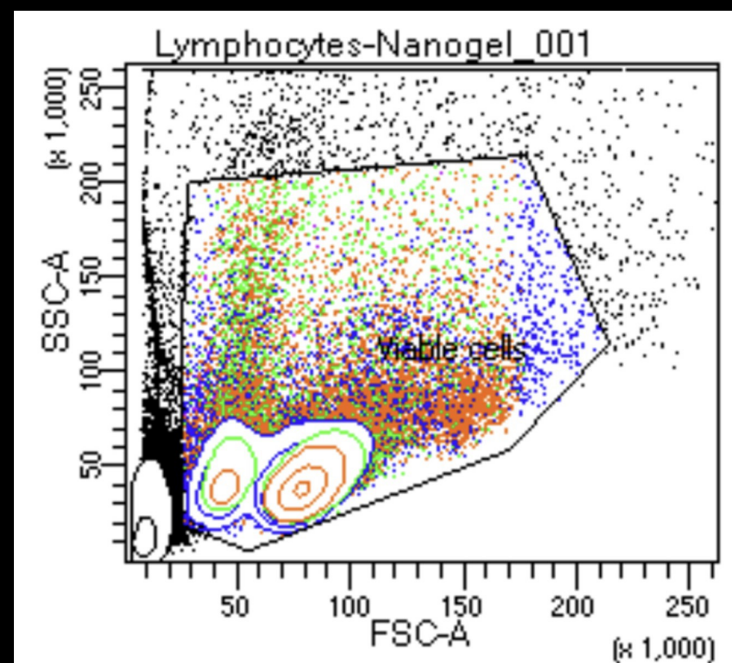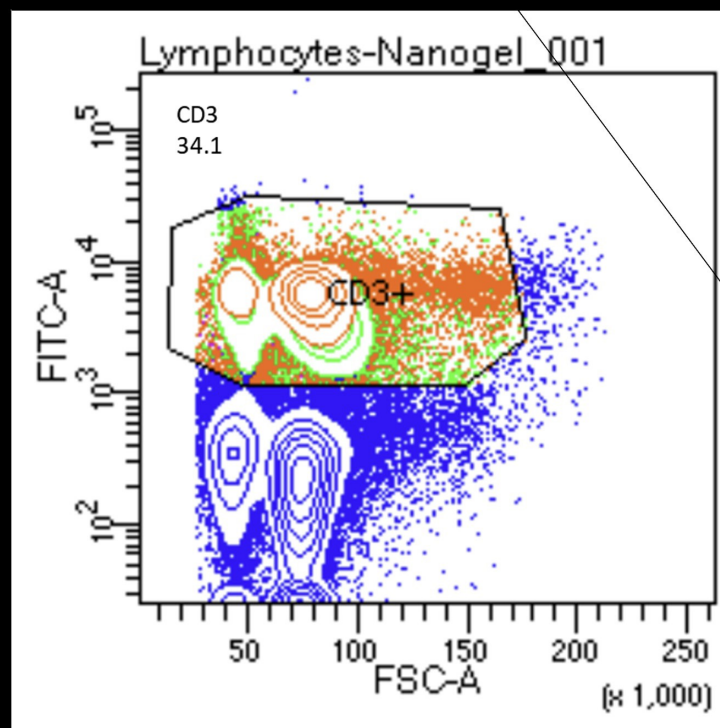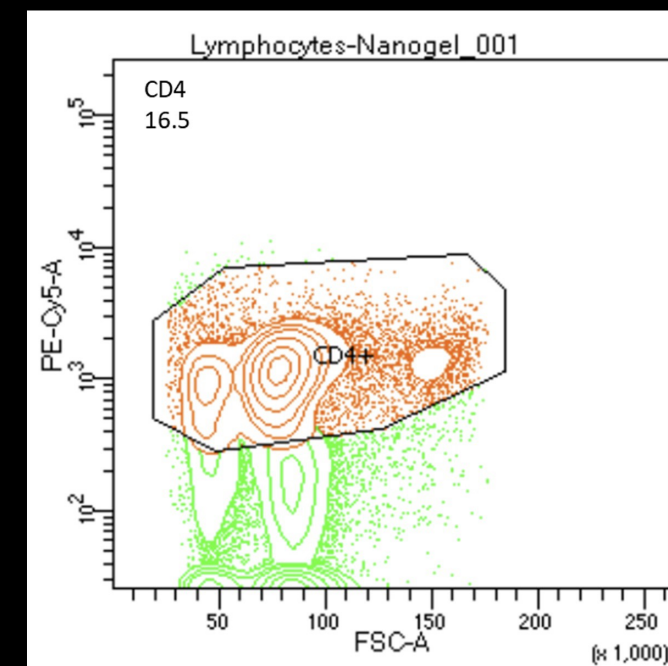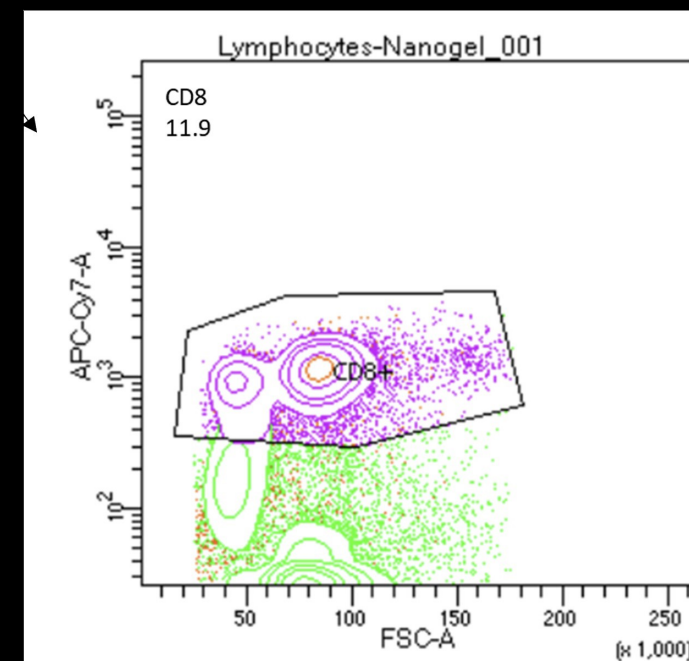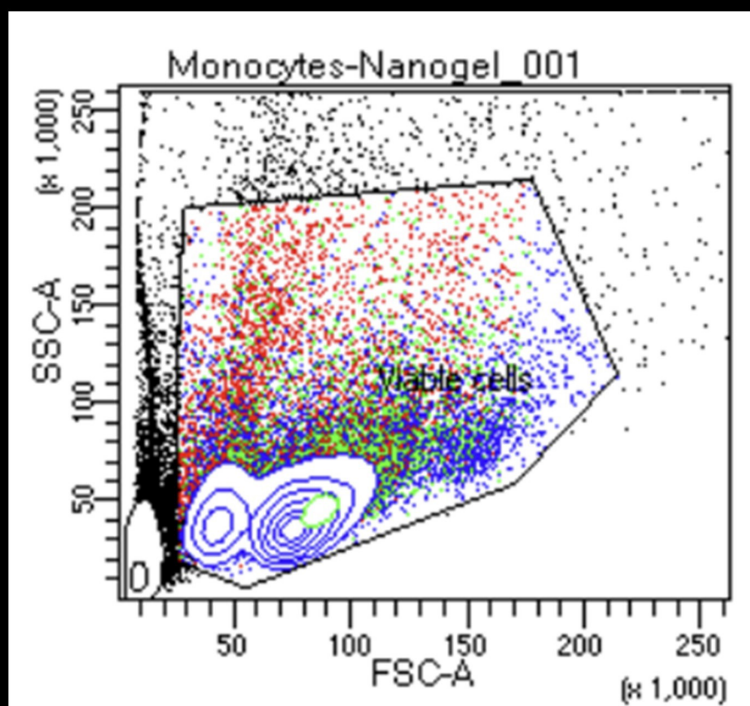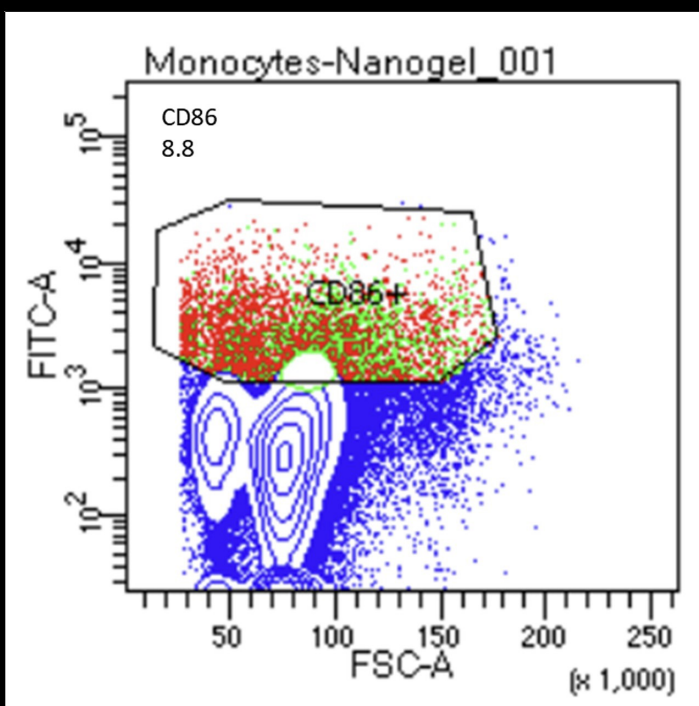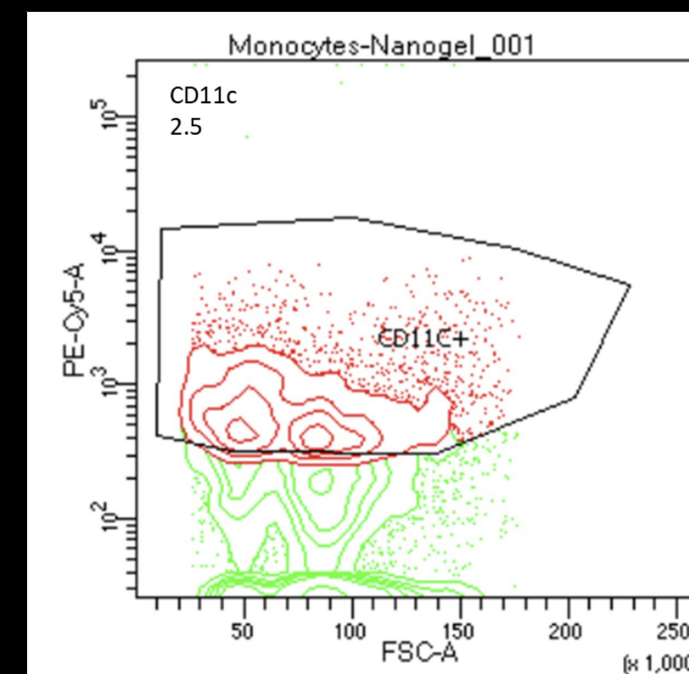

Supplement: d3bm01150j15.pdf [file d3bm01150j15.pdf]

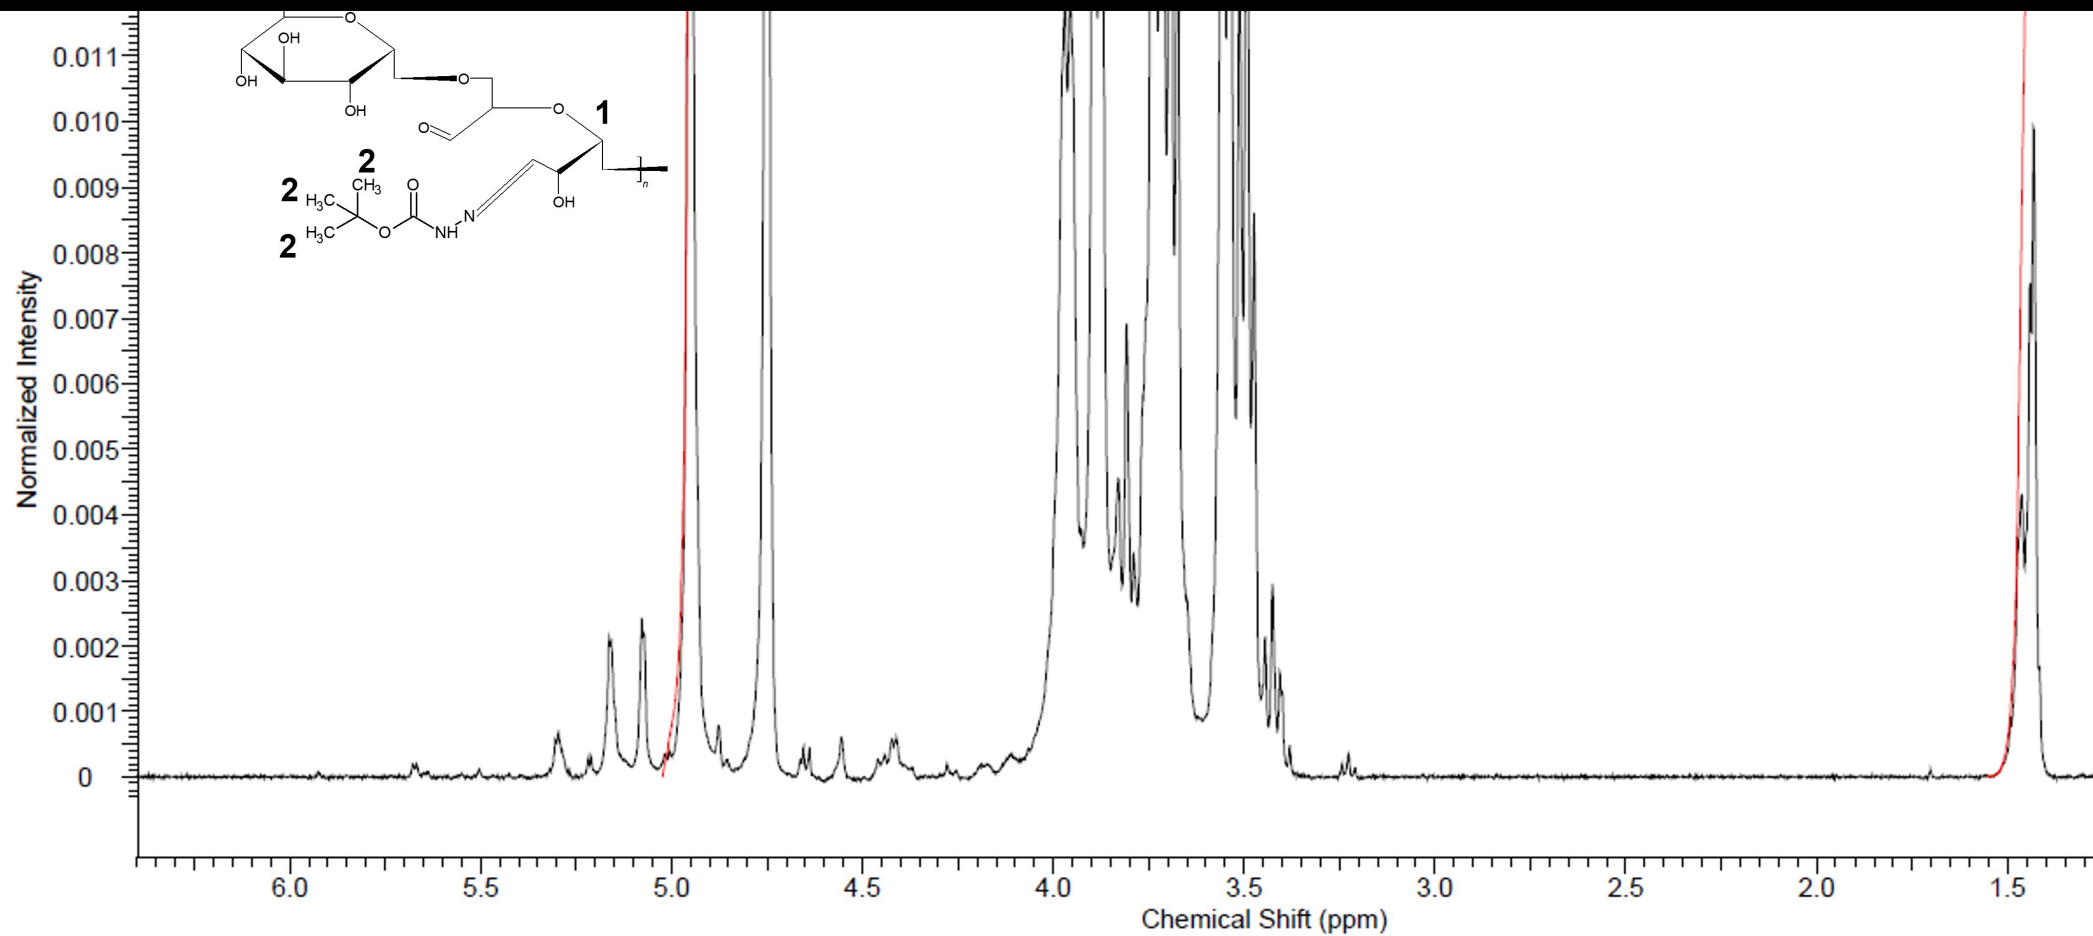

Supplement: d3bm01150j3.pdf [file d3bm01150j3.pdf]

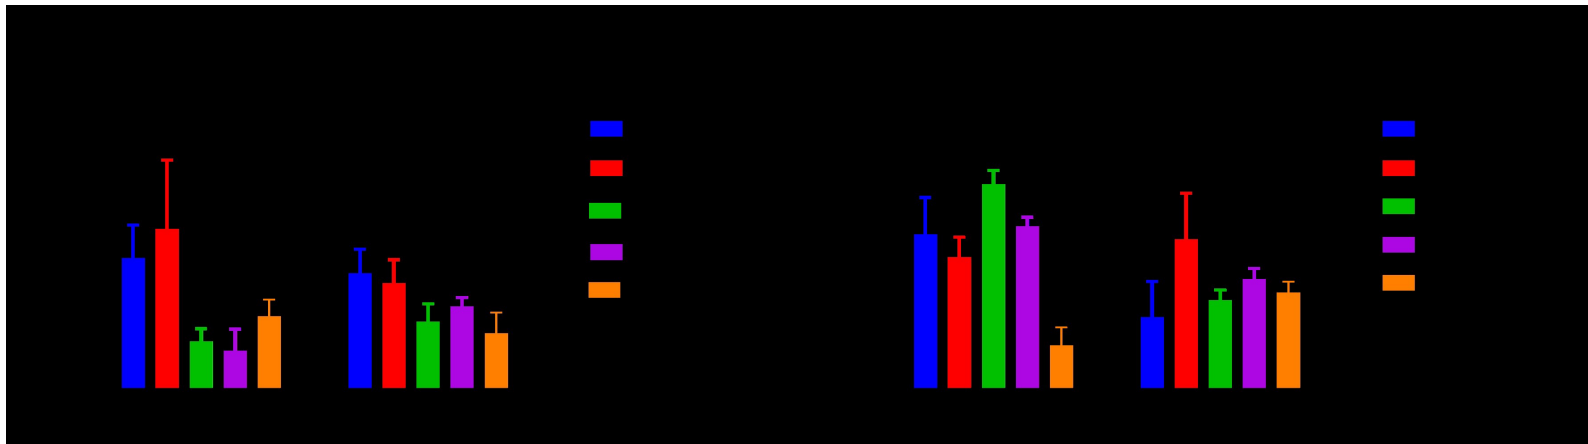

Supplement: d3bm01150j4.pdf [file d3bm01150j4.pdf]

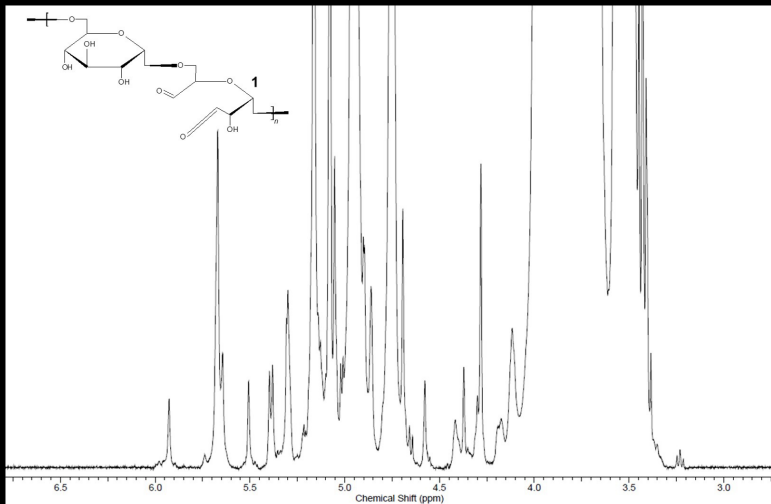

Supplement: d3bm01150j5.pdf [file d3bm01150j5.pdf]

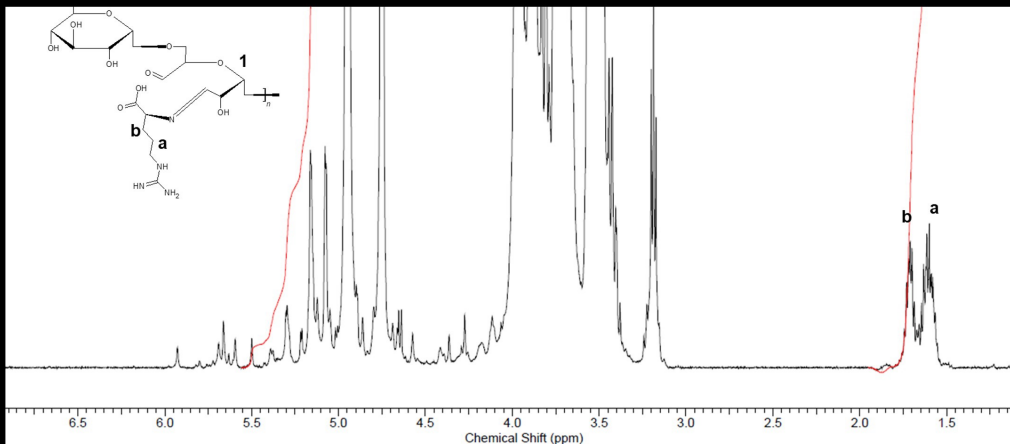

Supplement: d3bm01150j6.pdf [file d3bm01150j6.pdf]

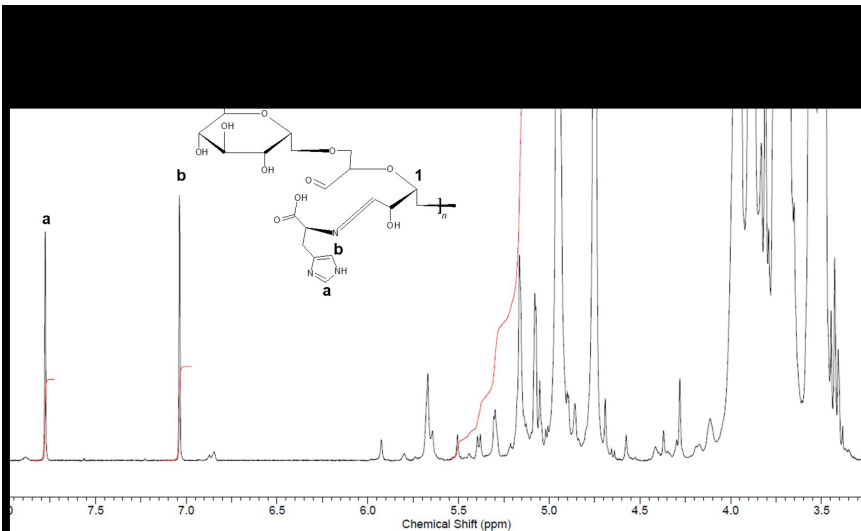

Supplement: d3bm01150j7.pdf [file d3bm01150j7.pdf]

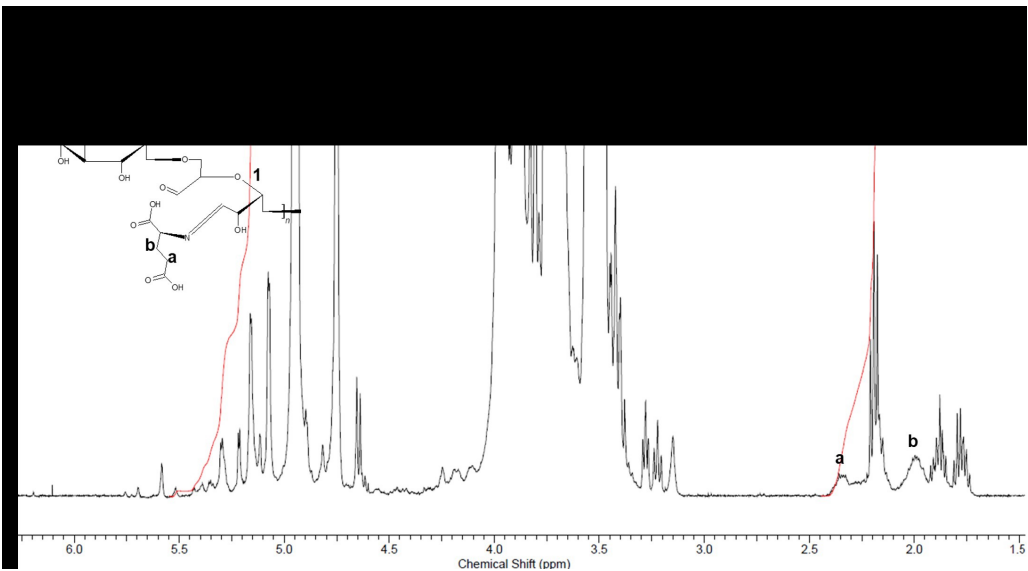

Supplement: d3bm01150j8.pdf [file d3bm01150j8.pdf]

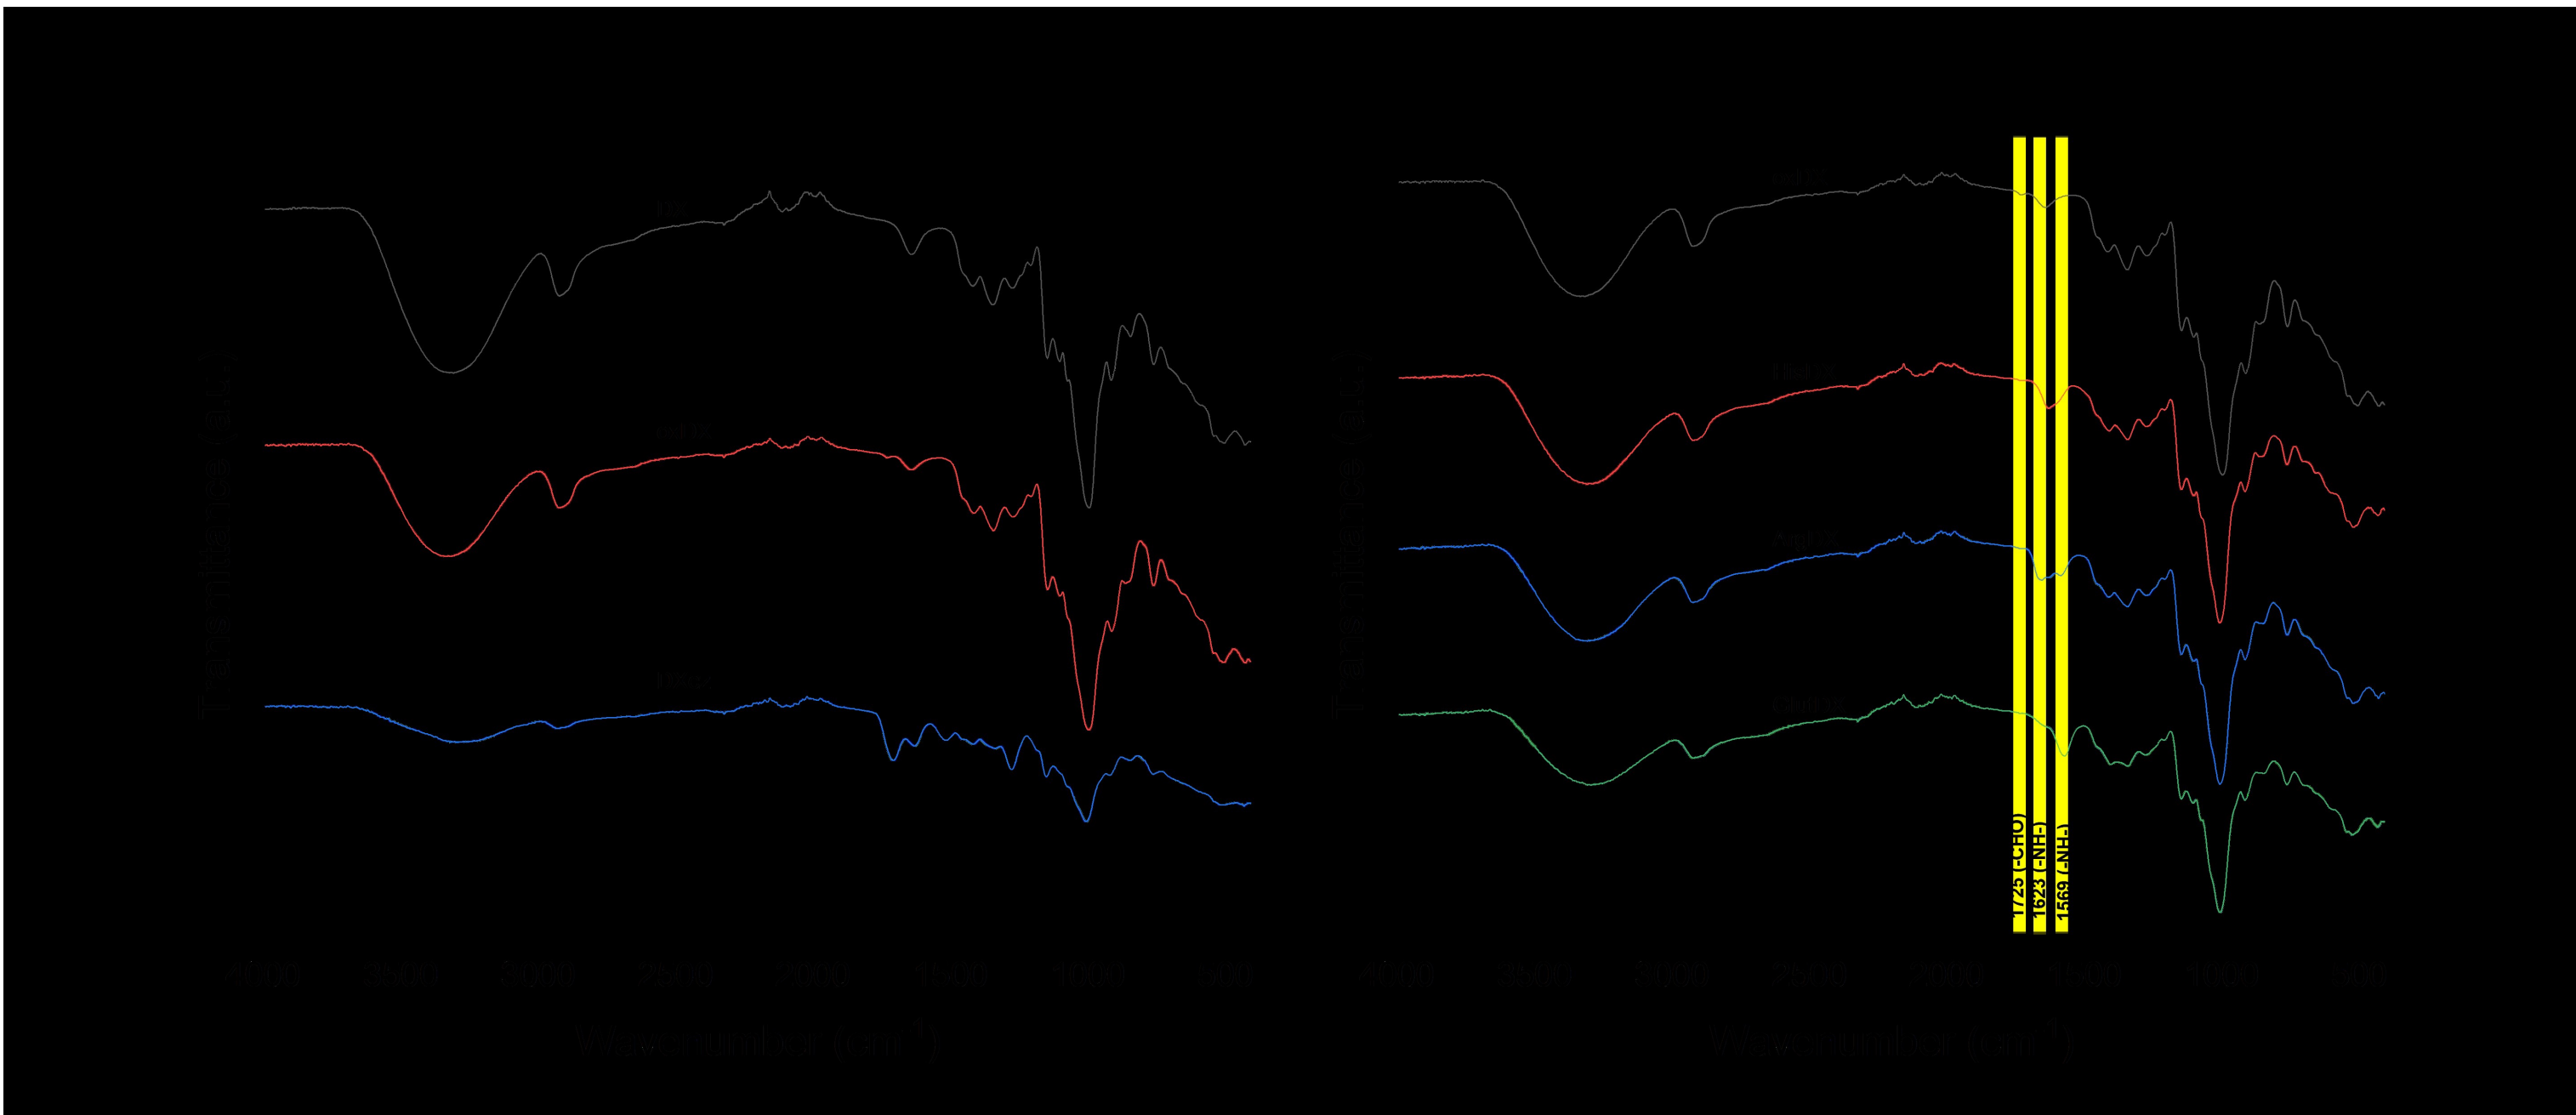

Supplement: d3bm01150j9.pdf [file d3bm01150j9.pdf]
